# Supplementary material for: Fever integrates antimicrobial defences, inflammation control, and tissue repair in a cold-blooded vertebrate
Source: eLife. 2023 Mar 14;12:e83644. doi: 10.7554/eLife.83644 (PMC10014077; doi:10.7554/eLife.83644)
Supplement: Figure 1—source data 1. [file elife-83644-fig1-data1.xlsx]

## Sheet: Figure 1C
Source Data - Figure 1 C
	Compartments
Time (h)	16°C	L19°C	R19°C	L21°C	R21°C	L23°C	R23°C	26°C
0-4	16.01	19.2	19.02	21.08	21.05	23.21	23.49	26.1
4-8	16.03	19.05	19.13	21.08	21.1	23.35	23.45	26.06
8-12	16.03	19.16	19.12	21.03	20.98	23.43	23.48	26.15
12-16	16.12	19.15	19.14	21.11	20.91	23.45	23.45	26.02
16-20	16.12	19.2	19.08	21.02	20.93	23.44	23.43	25.9
20-24	16.25	19.02	19.09	21.06	20.94	23.51	23.5	26.16
24-28	16.13	19.03	18.98	21.17	20.94	23.52	23.53	26.15
28-32	16.2	19.09	18.94	20.97	20.9	23.41	23.47	26
32-36	16.22	19.12	18.96	20.99	21	23.5	23.53	25.97
36-40	16.05	19.11	19.11	20.98	20.99	23.38	23.35	26.16
40-44	16.1	19.11	19.19	21.07	20.98	23.48	23.45	26.2
44-48	16.14	19.19	19.1	21.09	20.95	23.49	23.41	26.05
48-52	15.99	19.22	18.99	20.96	20.99	23.48	23.45	25.98
52-56	16.2	19.01	18.94	20.91	20.95	23.46	23.46	26.07
56-60	16.1	19.06	19.11	20.99	20.88	23.47	23.47	26.11
60-64	16	19.2	19.15	21.06	20.86	23.34	23.32	26.3
64-68	16.2	19.1	18.99	21	20.89	23.52	23.46	26.12
68-72	16.2	19.11	18.98	20.97	20.99	23.44	23.34	26.16
72-76	16.3	19.2	19.06	21	20.97	23.42	23.4	26.16
76-80	16.11	19.21	19.06	21.04	20.97	23.5	23.5	26.25
80-84	16.22	19.18	19.06	21.12	20.93	23.4	23.38	26.11
84-88	16	19.14	18.99	20.98	21	23.41	23.47	26.18
88-92	16.11	19.23	18.99	20.99	21	23.46	23.36	26.05
92-96	16.13	19.09	19.15	21	20.99	23.27	23.47	26.13
96-100	15.98	19.08	19.25	21.22	20.91	23.2	23.4	26.2
100-104	15.92	19.08	19.15	21.14	20.97	23.23	23.33	26.16
104-108	16	19.01	18.99	21.12	20.99	23.3	23.34	26.15
108-112	15.99	19.1	18.99	21.04	20.98	23.23	23.33	26.16
112-116	16.02	19.09	19.16	21.13	20.98	23.33	23.43	26.15
116-120	15.99	19.09	18.97	21.12	21.12	23.28	23.38	26.13
120-124	16.1	19	18.97	20.94	21	23.34	23.34	26.02
124-128	16	19.11	19.08	20.95	21	23.24	23.34	26.05
128-132	15.99	19.11	18.99	20.92	21	23.35	23.35	26.18
132-136	15.99	19.17	18.97	21.03	20.95	23.38	23.38	26.24
136-140	16.14	19.22	18.99	21.01	20.88	23.36	23.46	26.22
140-144	16.16	19.06	19.05	20.94	21	23.4	23.42	25.98
144-148	15.99	19.13	19.1	20.92	21	23.29	23.39	25.99
148-152	15.99	19.13	19.15	20.92	20.91	23.23	23.33	26
152-156	15.97	19.13	19.15	20.92	20.89	23.34	23.44	26.02
156-160	15.9	19.13	19.2	20.91	20.9	23.4	23.47	25.99
160-164	15.9	19.12	19.2	20.96	20.92	23.3	23.34	25.99
164-168	16.02	19.14	19.2	20.98	20.94	23.22	23.43	26.01
168-172	16.05	19.17	19.04	20.93	20.99	23.11	23.41	26.07
172-176	16.05	19.23	18.99	20.93	20.97	23.3	23.4	25.88
176-180	16.14	19.27	19.22	20.97	20.96	23.5	23.55	25.89
180-184	16.06	19.06	18.97	20.97	20.96	23.11	23.41	25.99
184-188	15.98	19.22	19.3	20.94	20.99	23.25	23.45	26.1
188-192	16.2	19.22	18.99	20.94	20.99	23.35	23.55	26.07
192-196	16.03	19.16	18.93	20.95	20.89	23.42	23.55	25.94
196-200	15.97	19.16	18.97	20.95	20.89	23.28	23.38	26.11
200-204	16	19.27	18.97	20.92	21	23.33	23.45	26.12
204-208	15.93	19.18	19.13	20.92	21	23.38	23.48	26.1
208-212	15.94	19.15	19.18	20.92	20.99	23.24	23.34	25.98
212-216	16.02	19.13	19.21	20.9	20.98	23.29	23.42	26.07
216-220	15.99	19.18	19.07	20.99	21	23.3	23.35	26.11
220-224	15.82	19.2	19.06	20.94	20.89	23.28	23.38	26.12
224-228	15.86	19.22	18.99	20.93	20.9	23.49	23.59	26.08
228-232	15.83	19.06	18.99	20.93	20.92	23.39	23.59	26.05
232-236	16.1	19.19	18.95	20.97	20.93	23.24	23.4	26.1
236-240	16.11	19.25	18.99	20.94	20.99	23.4	23.43	26.12
240-244	16.28	19.04	18.91	20.94	20.96	23.39	23.48	26.12
244-248	16.18	19.04	18.91	20.91	21	23.38	23.34	26.26
248-252	16.19	19.21	19.13	20.91	20.87	23.36	23.55	25.99
252-256	15.98	19.2	18.99	20.99	20.82	23.29	23.39	26
256-260	16.15	19.03	19.03	21	21	23.41	23.48	26
260-264	16.16	19.14	19.11	21	21	23.28	23.48	26.11
264-268	16.22	19.16	18.9	21	20.99	23.25	23.45	25.92
268-272	15.88	19.12	18.9	20.99	20.89	23.35	23.45	25.94
272-276	16.13	19.12	19	20.91	20.95	23.46	23.54	25.89
276-280	15.99	19.08	19	20.98	20.97	23.42	23.49	25.97
280-284	16.07	19.08	19.04	20.99	20.87	23.27	23.47	25.91
284-288	16.06	19.14	19.03	20.9	21.02	23.23	23.23	25.89
288-292	15.9	19.17	18.92	20.96	20.99	23.45	23.46	25.92
292-296	15.99	19.13	18.92	20.96	20.95	23.45	23.49	25.95
296-300	16.16	19.1	18.99	20.95	20.95	23.54	23.57	25.84
300-304	15.98	19.07	19.01	20.93	20.97	23.49	23.59	25.97
304-308	16.03	19.02	19.04	20.95	20.87	23.47	23.39	25.93
308-312	16.02	19.15	19.01	20.93	21.02	23.23	23.48	25.79
312-316	15.98	19.17	18.92	20.96	20.99	23.45	23.46	25.89
316-320	15.97	19.13	18.92	20.96	20.95	23.45	23.49	25.94
320-324	16.16	19.1	18.99	20.95	20.95	23.54	23.57	25.84
324-328	15.98	19.07	19.01	20.93	20.97	23.49	23.59	25.97
328-332	16.03	19.02	19.04	20.95	20.87	23.47	23.39	25.93
332-336	16.02	19.15	19.01	20.93	21.02	23.23	23.48	25.79
