# Supplementary material for: Fever integrates antimicrobial defences, inflammation control, and tissue repair in a cold-blooded vertebrate
Source: eLife. 2023 Mar 14;12:e83644. doi: 10.7554/eLife.83644 (PMC10014077; doi:10.7554/eLife.83644)
Supplement: Figure 2—source data 1. [file elife-83644-fig2-data1.xlsx]

## Sheet: Figure 2B
Source Data - Figure 2B
Thermal preference
Time (h)	Control	Aeromonas				Time (h)	Aeromonas				Time (h)	Control
0-6	23.62	23.2				0-3	23.2				0-3	23.62
6-12	23.74	23.58				3-6	23.48				3-6	23.74
12-18	23.89	23.84				6-9	23.58				6-9	23.89
18-24	23.9	24.79				9-12	23.71				9-12	23.9
24-30	23.45	24.99				12-15	23.84				12-15	23.45
30-36	23.9	25.23				15-18	24.22				15-18	23.9
36-42	23.11	25.17				18-21	24.79				18-21	23.11
42-48	23	25.36				21-24	24.88				21-24	23
48-54	23	25.41				24-27	24.99				24-27	23
54-60	22.5	25.32				27-30	25.12				27-30	22.5
60-66	22.49	25.45				30-33	25.23				30-33	22.49
66-72	22.5	25.34				33-36	25.17				33-36	22.5
72-78	22.4	25.39				36-39	25.26				36-39	22.4
78-84	22.9	25.43				39-42	25.36				39-42	22.9
84-90	22.79	25.46				42-45	25.33				42-45	22.79
90-96	22.5	25.38				45-48	25.41				45-48	22.5
96-102	22.61	25.37				48-51	25.41				48-51	22.61
102-108	22.66	25.28				51-54	25.32				51-54	22.66
108-114	22.7	25.26				54-57	25.52				54-57	22.7
114-120	22.71	25.12				57-60	25.45				57-60	22.71
120-126	22.6	25.14				60-63	25.34				60-63	22.64
126-132	22.41	25.19				63-66	25.39				63-66	22.87
132-138	22.33	25.16				66-69	25.38				66-69	22.62
138-144	22.65	25.2				69-72	25.43				69-72	22.87
144-150	22.44	25.22				72-75	25.44				72-75	23
150-156	22.49	25.15				75-78	25.46				75-78	22.67
156-162	22.94	25.27				78-81	25.28				78-81	22.49
162-168	23.01	25.13				81-84	25.38				81-84	22.6
168-174	23.12	25.23				84-87	25.33				84-87	22.67
174-180	22.55	25.14				87-90	25.37				87-90	22.2
180-186	22.68	25.44				90-93	25.28				90-93	22.5
186-192	22.41	25.19				93-96	25.26				93-96	22.1
192-198	22.14	25.33				96-99	25.22				96-99	22.6
198-204	22.63	25.11				99-102	25.12				99-102	22.9
204-210	23.01	25.03				102-105	25.24				102-105	23.2
210-216	22.64	24.72				105-108	25.14				105-108	22
216-222	22.87	24.09				108-111	25.18				108-111	23.11
222-228	22.62	24.08				111-114	25.18				111-114	23
228-234	22.87	24.08				114-117	25.2				114-117	23
234-240	23	24.19				117-120	25.1				117-120	22.5
240-246	22.67	24.04				120-123	25.13				120-123	22.49
246-252	22.49	23.99				123-127	25.088				123-127	22.5
252-258	22.6	23.72				127-130	25.1				127-130	22.4
258-264	22.67	23.82				130-133	25.014				130-133	22.9
264-270	22.2	24.02				133-136	25.011				133-136	22.71
270-276	22.5	23.52				136-139	25.111				136-139	22.64
276-282	22.1	23.24				139-142	25.099				139-142	22.87
282-288	22.6	22.87				142-145	25.0147				142-145	22.62
288-294	22.9	23.62				145-148	25.154				145-148	22.87
294-300	23.2	23.74				148-151	25.322				148-151	23
300-306	22	23.89				151-154	25.0147				151-154	22.67
306-312	23.11	23.9				154-157	25.1112				154-157	22.49
312-318	23.14	23.88				157-160	25.1498				157-160	22.6
						160-163	25.251				160-163	22.67
						163-166	25.196				163-166	23.02
						166-169	25.1271				166-169	22.5
						169-172	25.221				169-172	22.49
						172-175	25.142				172-175	22.5
						175-178	25.0369				175-178	22.4
						178-181	25.1235				178-181	23.11
						181-184	25.1023				181-184	23
						184-187	25.0825				184-187	23
						187-190	25.0746				187-190	22.5
						190-193	25.0891				190-193	22.49
						193-196	25.213				193-196	22.35
						196-199	25.147				196-199	22.47
						199-202	25.236				199-202	23.25
						202-205	25.147				202-205	22.66
						205-208	25.321				205-208	22.7
						208-211	25.248				208-211	22.71
						211-214	25.3214				211-214	22.64
						214-217	25.3214				214-217	22.87
						217-220	24.72				217-220	22.62
						220-223	24.09				220-223	22.87
						223-225	24.08				223-225	23
						225-228	24.08				225-228	22.67
						228-231	24.12				228-231	22.49
						231-234	24.14				231-234	22.6
						234-237	24.05				234-237	22.67
						237-240	24.01				237-240	23.02
						240-243	24.19				240-243	22.5
						243-247	24.04				243-247	22.49
						247-250	23.99				247-250	22.5
						250-253	23.72				250-253	22.4
						253-256	23.82				253-256	22.49
						256-259	24.02				256-259	22.5
						259-262	23.52				259-262	22.4
						262-265	23.24				262-265	22.9
						265-268	22.87				265-268	22.79
						268-271	23.62				268-271	22.5
						271-274	23.74				271-274	22.61
						274-277	23.89				274-277	22.66
						277-280	23.9				277-280	22.7
						280-283	23.45				280-283	22.71
						283-286	23.9				283-286	22.64
						286-289	23.11				286-289	22.87
						289-292	23				289-292	22.62
						292-295	23				292-295	22.87
						295-298	22.5				295-298	22.31
						298-301	22.49				298-301	22.48
						301-304	22.35				301-304	22.1
						304-307	22.47				304-307	22.33
						307-310	23.25				307-310	22.54
						310-313	22.66				310-313	22.25
						313-316	22.7				313-316	22.31
						316-319	22.71				316-319	22.4
						319-322	22.64				319-322	23.02
						322-325	22.87				322-325	23
						325-328	22.62				325-328	22.5
						328-331	22.87				328-331	22.49
						331-334	23				331-334	22.5
						334-337	22.67				334-337	22.4
						337-340	22.49				337-340	22.9
						340-343	22.6				340-343	22.79
						343-346	22.67				343-346	22.5
						346-349	23.02				346-349	22.61
						349-352	22.5				349-352	22.66
						352-355	22.49				352-355	22.7
						355-358	22.5				355-358	22.71
						358-361	22.4				358-361	22.16
