# Supplementary material for: Fever integrates antimicrobial defences, inflammation control, and tissue repair in a cold-blooded vertebrate
Source: eLife. 2023 Mar 14;12:e83644. doi: 10.7554/eLife.83644 (PMC10014077; doi:10.7554/eLife.83644)
Supplement: Figure 2—source data 2. [file elife-83644-fig2-data2.xlsx]

## Sheet: Figure2C
Source Data - Figure 2C
Velocity
Time (h)	Control	Aeromonas				Time (h)	Aeromonas				Time (h)	Control
0-6	1.88857	1.47286				0-3	1.47286				0-3	1.88857
6-12	1.94133	1.03843				3-6	1.03843				3-6	1.94133
12-18	2.15529	1.10335				6-9	1.10335				6-9	2.15529
18-24	2.28359	1.12964				9-12	1.12964				9-12	2.28359
24-30	2.21283	1.18333				12-15	1.18857				12-15	2.47286
30-36	2.27255	1.15912				15-18	1.14133				15-18	2.03843
36-42	2.28936	1.10667				18-21	1.15529				18-21	2.10335
42-48	2.24216	1.08333				21-24	1.08359				21-24	2.12964
48-54	2.56049	1.01333				24-27	1.18333				24-27	2.18857
54-60	2.43056	0.946667				27-30	0.859124				27-30	2.14133
60-66	2.67512	0.936667				30-33	0.906667				30-33	2.15529
66-72	2.87795	0.961813				33-36	0.983333				33-36	2.08359
72-78	2.94359	0.916667				36-39	0.913333				36-39	2.18333
78-84	2.82716	0.906667				39-42	0.946667				39-42	2.85912
84-90	2.60011	0.906667				42-45	0.936667				42-45	2.90667
90-96	2.67653	0.97				45-48	0.961813				45-48	2.98333
96-102	2.76122	0.896667				48-51	0.916667				48-51	2.91333
102-108	2.94572	0.901567				51-54	0.906667				51-54	2.94667
108-114	3.34435	0.987317				54-57	0.906667				54-57	2.93667
114-120	2.99875	0.912332				57-60	0.97				57-60	2.96181
120-126	3.1246	0.945123				60-63	0.869667				60-63	2.91667
126-132	3.22146	0.952147				63-66	0.801567				63-66	2.90667
132-138	3.19852	0.944652				66-69	0.887317				66-69	2.90667
138-144	3.21459	0.952				69-72	0.820862				69-72	2.97
144-150	3.00125	0.889784				72-75	0.350931				72-75	2.86967
150-156	3.01246	0.869521				75-78	0.410448				75-78	2.80157
156-162	3.12458	0.975412				78-81	0.853076				78-81	2.88732
162-168	3.02146	0.876895				81-84	0.440553				81-84	2.82086
168-174	2.9988	0.996541				84-87	0.4123				84-87	2.35093
174-180	2.99633	0.996352				87-90	0.5314				87-90	2.41045
180-186	2.98887	1.42086				90-93	0.5879				90-93	2.85308
186-192	3.0123	1.35093				93-96	0.4569				93-96	2.44055
192-198	3.2314	1.41045				96-99	0.654789				96-99	2.4123
198-204	3.25879	1.35308				99-102	0.98741				99-102	2.5314
204-210	3.4569	1.44055				102-105	0.89				102-105	2.21283
210-216	3.65479	1.94783				105-108	0.854				105-108	2.27255
216-222	2.98741	2.10063				108-111	0.942				108-111	2.28936
222-228	2.89	2.57347				111-114	0.987				111-114	2.24216
228-234	2.854	2.63558				114-117	0.963				114-117	2.56049
234-240	2.942	2.65789				117-120	0.98741				117-120	2.43056
240-246	2.987	2.71473				120-123	0.98887				120-123	2.67512
246-252	2.963	2.60448				123-127	0.90123				123-127	2.87795
252-258	2.98741	2.57345				127-130	0.92314				127-130	2.94359
258-264	2.98887	2.62045				130-133	0.825879				130-133	2.82716
264-270	3.0123	2.66838				133-136	0.84569				133-136	2.60011
270-276	3.2314	2.83621				136-139	0.965479				136-139	2.67653
276-282	3.25879	2.76582				139-142	0.90213				139-142	2.76122
282-288	3.4569	2.75635				142-145	0.90001				142-145	2.94572
288-294	3.65479	2.74624				145-148	0.859698				145-148	3.34435
294-300	3.0213	2.4726				148-151	0.9987				148-151	2.98887
300-306	3.0001	2.45669				151-154	0.92314				151-154	3.0123
306-312	2.59698	2.27983				154-157	0.93654				154-157	3.2314
312-318	2.9987	2.42631				157-160	0.4569				157-160	3.25879
						160-163	0.654789				160-163	3.4569
						163-166	0.98741				163-166	3.65479
						166-169	0.89				166-169	2.98741
						169-172	0.854				169-172	2.89
						172-175	0.942				172-175	2.854
						175-178	0.987				175-178	2.942
						178-181	0.963				178-181	2.987
						181-184	0.98741				181-184	2.963
						184-187	0.98887				184-187	2.98741
						187-190	0.90123				187-190	2.98887
						190-193	0.92314				190-193	3.0123
						193-196	0.825879				193-196	3.2314
						196-199	0.84569				196-199	3.25879
						199-202	0.965479				199-202	3.4569
						202-205	0.90213				202-205	3.65479
						205-208	0.90001				205-208	3.0213
						208-211	0.859698				208-211	3.0001
						211-214	0.9987				211-214	2.59698
						214-217	0.92314				214-217	2.9987
						217-220	1.88857				217-220	3.2314
						220-223	1.94133				220-223	3.3654
						223-225	2.15529				223-225	2.28359
						225-228	2.28359				225-228	2.47286
						228-231	2.21283				228-231	2.03843
						231-234	2.27255				231-234	2.10335
						234-237	2.28936				234-237	2.12964
						237-240	2.24216				237-240	2.18857
						240-243	2.56049				240-243	2.14133
						243-247	2.43056				243-247	2.15529
						247-250	2.67512				247-250	2.08359
						250-253	2.87795				250-253	2.18333
						253-256	2.94359				253-256	2.85912
						256-259	2.82716				256-259	2.90667
						259-262	2.60011				259-262	2.98333
						262-265	2.67653				262-265	2.91333
						265-268	2.76122				265-268	2.94667
						268-271	2.94572				268-271	2.93667
						271-274	3.34435				271-274	2.96181
						274-277	2.98887				274-277	2.91667
						277-280	1.94783				277-280	2.90667
						280-283	2.10063				280-283	2.90667
						283-286	2.57347				283-286	2.97
						286-289	2.63558				286-289	2.86967
						289-292	2.65789				289-292	2.80157
						292-295	2.71473				292-295	2.88732
						295-298	2.60448				295-298	2.82086
						298-301	2.57345				298-301	2.35093
						301-304	2.62045				301-304	2.41045
						304-307	2.66838				304-307	2.85308
						307-310	2.83621				307-310	2.44055
						310-313	2.76582				310-313	2.25529
						313-316	2.75635				313-316	2.27359
						316-319	2.74623				316-319	2.28283
						319-322	2.47261				319-322	2.28255
						322-325	2.45669				322-325	2.29936
						325-328	2.27983				325-328	2.25216
						328-331	2.42631				328-331	2.66049
						331-334	2.59236				331-334	2.53056
						334-337	2.54736				334-337	2.77512
						337-340	2.87795				337-340	2.77795
						340-343	2.94359				340-343	2.84359
						343-346	2.82716				343-346	2.72716
						346-349	2.60011				346-349	2.80011
						349-352	2.67653				349-352	2.77653
						352-355	2.76122				352-355	2.78612
						355-358	2.94572				355-358	2.84572
						358-361	3.34435				358-361	3.04434
