# Supplementary material for: Fever integrates antimicrobial defences, inflammation control, and tissue repair in a cold-blooded vertebrate
Source: eLife. 2023 Mar 14;12:e83644. doi: 10.7554/eLife.83644 (PMC10014077; doi:10.7554/eLife.83644)
Supplement: Figure 2—source data 3. [file elife-83644-fig2-data3.xlsx]

## Sheet: Figure 2D
Source Data - Figure 2D
Zone transition
Time (h)	Control	Aeromonas				Time (h)	Aeromonas				Time (h)	Control
0-6	101	101				0-3	101				0-3	101
6-12	115	58				3-6	58				3-6	115
12-18	86	67				6-9	67				6-9	86
18-24	86	57				9-12	57				9-12	86
24-30	96	30				12-15	55				12-15	96
30-36	88	22				15-18	60				15-18	88
36-42	86	20				18-21	30				18-21	86
42-48	91	12				21-24	22				21-24	91
48-54	82	10				24-27	20				24-27	82
54-60	88	10				27-30	12				27-30	88
60-66	91	9				30-33	10				30-33	91
66-72	90	8				33-36	10				33-36	90
72-78	101	8				36-39	9				36-39	101
78-84	110	7				39-42	8				39-42	110
84-90	112	2				42-45	8				42-45	112
90-96	131	4				45-48	8				45-48	131
96-102	136	9				48-51	7				48-51	136
102-108	144	10				51-54	6				51-54	144
108-114	120	10				54-57	5				54-57	120
114-120	123	9				57-60	8				57-60	122
120-126	124	8				60-63	4				60-63	129
126-132	129	7				63-66	4				63-66	124
132-138	131	7				66-69	4				66-69	119
138-144	132	6				69-72	4				69-72	125
144-150	133	8				72-75	3				72-75	125
150-156	128	9				75-78	2				75-78	129
156-162	122	10				78-81	1				78-81	132
162-168	120	11				81-84	1				81-84	139
168-174	118	13				84-87	1				84-87	136
174-180	120	15				87-90	1				87-90	143
180-186	122	15				90-93	1				90-93	148
186-192	129	13				93-96	1				93-96	148
192-198	124	22				96-99	1				96-99	166
198-204	119	38				99-102	1				99-102	154
204-210	125	68				102-105	1				102-105	155
210-216	125	82				105-108	3				105-108	152
216-222	129	78				108-111	5				108-111	150
222-228	132	104				111-114	4				111-114	159
228-234	139	79				114-117	5				114-117	127
234-240	136	96				117-120	6				117-120	133
240-246	143	95				120-123	4				120-123	142
246-252	148	88				123-127	5				123-127	130
252-258	148	103				127-130	6				127-130	129
258-264	166	92				130-133	7				130-133	112
264-270	154	74				133-136	10				133-136	101
270-276	155	68				136-139	5				136-139	110
276-282	152	64				139-142	6				139-142	114
282-288	150	74				142-145	5				142-145	119
288-294	159	89				145-148	6				145-148	125
294-300	127	104				148-151	7				148-151	128
300-306	133	90				151-154	3				151-154	133
306-312	142	78				154-157	4				154-157	148
312-318	130	69				157-160	4				157-160	122
						160-163	5				160-163	116
						163-166	4				163-166	111
						166-169	4				166-169	126
						169-172	4				169-172	138
						172-175	4				172-175	149
						175-178	5				175-178	166
						178-181	5				178-181	142
						181-184	6				181-184	155
						184-187	6				184-187	139
						187-190	6				187-190	139
						190-193	6				190-193	139
						193-196	2				193-196	144
						196-199	6				196-199	147
						199-202	3				199-202	120
						202-205	4				202-205	100
						205-208	5				205-208	122
						208-211	6				208-211	133
						211-214	7				211-214	102
						214-217	10				214-217	102
						217-220	14				217-220	102
						220-223	16				220-223	155
						223-225	18				223-225	101
						225-228	16				225-228	110
						228-231	13				228-231	112
						231-234	11				231-234	131
						234-237	38				234-237	136
						237-240	68				237-240	144
						240-243	82				240-243	120
						243-247	78				243-247	122
						247-250	104				247-250	129
						250-253	79				250-253	124
						253-256	96				253-256	119
						256-259	95				256-259	125
						259-262	88				259-262	125
						262-265	103				262-265	129
						265-268	92				265-268	132
						268-271	74				268-271	139
						271-274	68				271-274	136
						274-277	64				274-277	143
						277-280	74				277-280	148
						280-283	89				280-283	83
						283-286	104				283-286	81
						286-289	90				286-289	89
						289-292	78				289-292	88
						292-295	69				292-295	92
						295-298	58				295-298	90
						298-301	49				298-301	102
						301-304	52				301-304	110
						304-307	54				304-307	99
						307-310	59				307-310	102
						310-313	62				310-313	101
						313-316	66				313-316	101
						316-319	72				316-319	101
						319-322	79				319-322	100
						322-325	83				322-325	122
						325-328	81				325-328	133
						328-331	89				328-331	102
						331-334	88				331-334	102
						334-337	92				334-337	102
						337-340	90				337-340	155
						340-343	102				340-343	101
						343-346	110				343-346	110
						346-349	99				346-349	112
						349-352	102				349-352	131
						352-355	101				352-355	136
						355-358	101				355-358	144
						358-361	101				358-361	120
