# Supplementary material for: Fever integrates antimicrobial defences, inflammation control, and tissue repair in a cold-blooded vertebrate
Source: eLife. 2023 Mar 14;12:e83644. doi: 10.7554/eLife.83644 (PMC10014077; doi:10.7554/eLife.83644)
Supplement: Figure 2—source data 4. [file elife-83644-fig2-data4.xlsx]

## Sheet: Figure 2E
SourceData - Figure 2E
Aeromonas						Saline						Merge
Time (h)	Mean Thermal preference	Mean Velocity	Mean Zone transitions/h			Time (h)	Mean Thermal preference	Mean Velocity	Mean Zone transitions/h			Time (h)	Mean Thermal preference	Mean Velocity	Mean Zone transitions/h	Category
1	25	1.4	9			1	23.4	1.8	97			1	23.4	1.8	97	Control
2	25.2	1.3	13			2	23.9	1.4	96			2	23.9	1.4	96	Control
3	25.2	0.8	9			3	23.1	1.4	93			3	23.1	1.4	93	Control
4	25.4	0.8	9			4	23	1.4	101			4	23	1.4	101	Control
5	25.4	0.8	8			5	23	1.3	106			5	23	1.3	106	Control
6	25.3	0.8	10			6	22.5	1.4	103			6	22.5	1.4	103	Control
7	25.4	0.8	9			7	22.5	1.3	114			7	22.5	1.3	114	Control
8	25.3	0.7	9			8	22.5	1.4	108			8	22.5	1.4	108	Control
9	25.4	0.7	7			9	22.4	1.7	106			9	22.4	1.7	106	Control
10	25.4	0.7	9			10	22.9	1.8	119			10	22.9	1.8	119	Control
11	25.5	0.6	9			11	22.8	2.1	125			11	22.8	2.1	125	Control
12	25.4	0.8	9			12	22.5	2	123			12	22.5	2	123	Control
13	25.4	0.7	8			13	22.6	2.2	126			13	22.6	2.2	126	Control
14	25.3	0.8	7			14	22.7	2.1	113			14	22.7	2.1	113	Control
15	25.3	0.5	8			15	22.7	2.4	112			15	22.7	2.4	112	Control
16	25.1	0.7	9			16	22.7	2.6	120			16	22.7	2.6	120	Control
17	24.7	0.7	8			17	22.6	2.4	127			17	22.6	2.4	127	Control
18	24.5	0.7	8			18	22.9	2.8	107			18	22.9	2.8	107	Control
19	24.5	0.8	9			19	22.6	3	116			19	22.6	3	116	Control
20	24.3	0.7	13			20	22.9	2.9	116			20	22.9	2.9	116	Control
21	24.4	0.8	9			21	23	2.9	134			21	23	2.9	134	Control
22	25	0.8	9			22	22.7	2.9	120			22	22.7	2.9	120	Control
23	25.6	0.8	8			23	22.5	2.9	122			23	22.5	2.9	122	Control
24	24.5	0.7	10			24	22.6	2.9	122			24	22.6	2.9	122	Control
25	24.4	0.8	9			25	22.7	3.1	121			25	22.7	3.1	121	Control
26	25	0.7	13			26	22.2	2.4	133			26	22.2	2.4	133	Control
27	25.1	0.6	9			27	22.5	2.7	127			27	22.5	2.7	127	Control
28	25.1	0.6	9			28	22.1	2.5	122			28	22.1	2.5	122	Control
29	25	0.7	8			29	22.6	2.5	119			29	22.6	2.5	119	Control
30	25.1	0.9	10			30	22.9	2.4	120			30	22.9	2.4	120	Control
31	25.1	0.6	8			31	23.2	2.6	132			31	23.2	2.6	132	Control
32	25.2	0.7	9			32	22	2.5	118			32	22	2.5	118	Control
33	24.8	0.8	8			33	23.1	2.8	127			33	23.1	2.8	127	Control
34	24.8	0.8	9			34	23	2.8	124			34	23	2.8	124	Control
35	25.5	0.7	9			35	23	2.8	124			35	23	2.8	124	Control
36	25.4	0.6	13			36	22.5	2.9	124			36	22.5	2.9	124	Control
37	25.2	0.6	9			37	22.5	3.1	128			37	22.5	3.1	128	Control
38	25.4	0.7	9			38	22.5	3.4	125			38	22.5	3.4	125	Control
39	24.9	0.5	8			39	22.4	3	127			39	22.4	3	127	Control
40	25.5	0.5	10			40	22.9	3	132			40	22.9	3	132	Control
41	24.9	0.6	8			41	22.6	3.1	129			41	22.6	3.1	129	Control
42	25.1	0.7	10			42	22.8	3	141			42	22.8	3	141	Control
43	25.2	0.7	10			43	22.8	2.9	135			43	22.8	2.9	135	Control
44	24.7	0.6	9			44	23	3	132			44	23	3	132	Control
45	25.1	0.7	9			45	22.9	3.1	135			45	22.9	3.1	135	Control
46	25.3	0.8	8			46	23	3.1	135			46	23	3.1	135	Control
47	25.1	0.8	9			47	23.2	2.7	125			47	23.2	2.7	125	Control
48	25.3	0.6	10			48	23	2.8	127			48	23	2.8	127	Control
49	25.2	0.8	9			49	22.8	2.7	125			49	22.8	2.7	125	Control
50	25.3	0.7	9			50	22.8	2.8	123			50	22.8	2.8	123	Control
51	25.3	0.8	8			51	22.9	2.7	130			51	22.9	2.7	130	Control
52	25.4	0.6	8			52	23	2.6	128			52	23	2.6	128	Control
53	25.5	0.7	10			53	22.8	2.9	125			53	22.8	2.9	125	Control
54	25.4	0.7	8			54	23	2.8	124			54	23	2.8	124	Control
55	25.6	0.7	10			55	22.9	2.8	126			55	22.9	2.8	126	Control
56	25.6	0.8	10			56	22.9	2.8	132			56	22.9	2.8	132	Control
57	25.5	0.7	9			57	23	3	135			57	23	3	135	Control
58	25.3	0.6	9			58	23	2.8	128			58	23	2.8	128	Control
59	25.2	0.6	8			59	22.7	2.7	125			59	22.7	2.7	125	Control
60	25.3	0.7	9			60	22.7	2.9	135			60	22.7	2.9	135	Control
61	25.2	0.6	10			61	22.8	2.7	133			61	22.8	2.7	133	Control
62	24.9	0.7	9			62	23.1	2.7	127			62	23.1	2.7	127	Control
63	25	0.7	9			63	22.5	3	132			63	22.5	3	132	Control
64	24.8	0.7	8			64	22.8	2.9	126			64	22.8	2.9	126	Control
65	24.8	0.8	8			65	23.5	3	126			65	23.5	3	126	Control
66	24.8	0.7	10			66	23.2	3	123			66	23.2	3	123	Control
67	25.2	0.7	8			67	22.9	3	131			67	22.9	3	131	Control
68	25	0.8	10			68	23.1	2.9	132			68	23.1	2.9	132	Control
69	25	0.7	10			69	22.9	2.9	129			69	22.9	2.9	129	Control
70	25.1	0.9	9			70	22.9	2.9	128			70	22.9	2.9	128	Control
71	24.8	0.7	9			71	23	3	118			71	23	3	118	Control
72	25	0.6	8			72	22.8	2.9	124			72	22.8	2.9	124	Control
73	25.2	0.7	9			73	23	3.1	125			73	23	3.1	125	Control
74	24.8	0.6	10			74	22.9	2.9	125			74	22.9	2.9	125	Control
75	24.9	0.7	9			75	23.1	2.9	124			75	23.1	2.9	124	Control
76	24.9	0.6	9			76	22.9	2.8	129			76	22.9	2.8	129	Control
77	25.1	0.8	8			77	23	2.6	121			77	23	2.6	121	Control
78	25.1	0.7	8			78	22.9	2.8	120			78	22.9	2.8	120	Control
79	25.1	0.8	10			79	22.7	2.9	124			79	22.7	2.9	124	Control
80	25.1	0.7	8			80	22.8	3.2	112			80	22.8	3.2	112	Control
81	24.9	0.7	10			81	22.6	3	97			81	22.6	3	97	Control
82	25	0.7	10			82	23	2.9	96			82	23	2.9	96	Control
83	25.1	0.7	9			83	23.1	3.1	93			83	23.1	3.1	93	Control
84	24.9	0.7	9			84	22.7	3	101			84	22.7	3	101	Control
85	25	0.7	8			85	22.9	3.1	106			85	22.9	3.1	106	Control
86	25.8	0.8	9			86	23.1	2.9	103			86	23.1	2.9	103	Control
87	25.2	0.7	10			87	23.1	2.9	114			87	23.1	2.9	114	Control
88	25	0.6	9			88	23.1	3	108			88	23.1	3	108	Control
89	25.3	0.8	9			89	22.8	2.7	106			89	22.8	2.7	106	Control
90	24.9	0.7	8			90	22.8	2.9	119			90	22.8	2.9	119	Control
91	25.2	0.7	8			91	23.2	2.9	125			91	23.2	2.9	125	Control
92	25	0.7	10			92	23	2.7	123			92	23	2.7	123	Control
93	25.4	0.8	8			93	23.2	2.6	126			93	23.2	2.6	126	Control
94	25	0.8	10			94	23	2.9	113			94	23	2.9	113	Control
95	25	0.6	10			95	23	3	112			95	23	3	112	Control
96	25	0.7	9			96	23.2	2.9	120			96	23.2	2.9	120	Control
97	25	0.7	9			97	23.2	2.6	127			97	23.2	2.6	127	Control
98	25.2	0.8	8			98	23.2	2.6	107			98	23.2	2.6	107	Control
99	25	0.8	9			99	22.7	3.1	116			99	22.7	3.1	116	Control
100	25.1	0.5	10			100	23	3.2	116			100	23	3.2	116	Control
101	25	0.8	9			101	22.8	3.1	134			101	22.8	3.1	134	Control
102	25	0.7	9			102	22.8	2.9	120			102	22.8	2.9	120	Control
103	25.4	0.7	8			103	22.9	3.1	122			103	22.9	3.1	122	Control
104	25.1	0.7	9			104	23	3.1	122			104	23	3.1	122	Control
105	25.2	0.7	8			105	22.7	3.1	121			105	22.7	3.1	121	Control
106	25.2	0.7	8			106	22.9	2.9	133			106	22.9	2.9	133	Control
107	25.2	0.7	9			107	22.8	3.1	127			107	22.8	3.1	127	Control
108	25.2	0.8	7			108	23.2	3.2	122			108	23.2	3.2	122	Control
109	25.4	0.8	9			109	22	2.8	119			109	22	2.8	119	Control
110	25.1	0.7	9			110	22.1	2.8	120			110	22.1	2.8	120	Control
111	25.1	0.9	8			111	22.2	3.2	132			111	22.2	3.2	132	Control
112	25.3	0.8	8			112	22.3	3.1	118			112	22.3	3.1	118	Control
113	25.4	0.7	9			113	22	3.2	127			113	22	3.2	127	Control
114	24.8	0.7	10			114	22.3	3.1	124			114	22.3	3.1	124	Control
115	25.4	0.6	8			115	22	3.2	124			115	22	3.2	124	Control
116	25.2	0.7	11			116	22	3	124			116	22	3	124	Control
117	25.3	0.6	8			117	21.9	3	128			117	21.9	3	128	Control
118	25.3	0.5	8			118	22	3.2	125			118	22	3.2	125	Control
119	25.1	0.7	10			119	22	3	127			119	22	3	127	Control
120	25	0.7	7			120	22.2	3.3	132			120	22.2	3.3	132	Control
121	25.1	0.7	9			121	22	3.1	129			121	22	3.1	129	Control
122	25.4	0.7	9			122	21.9	3.1	141			122	21.9	3.1	141	Control
123	25.3	0.8	8			123	22	3	135			123	22	3	135	Control
124	25.5	0.8	8			124	22.6	3.2	132			124	22.6	3.2	132	Control
125	25.1	0.8	9			125	23	3.2	135			125	23	3.2	135	Control
126	25.4	0.6	10			126	23.1	2.9	135			126	23.1	2.9	135	Control
127	25.6	0.8	8			127	23.5	3	125			127	23.5	3	125	Control
128	25.4	0.7	11			128	23.6	2.7	127			128	23.6	2.7	127	Control
129	25.7	0.7	8			129	23.7	3	125			129	23.7	3	125	Control
130	25.4	0.7	8			130	23.9	3	123			130	23.9	3	123	Control
131	25.3	0.8	10			131	23.9	2.7	130			131	23.9	2.7	130	Control
132	25.5	0.8	7			132	23.8	3	128			132	23.8	3	128	Control
133	25.2	0.9	9			133	23.9	3.2	125			133	23.9	3.2	125	Control
134	25.4	0.7	9			134	23.1	3	124			134	23.1	3	124	Control
135	25.6	0.8	8			135	23	3	126			135	23	3	126	Control
136	25.5	0.6	8			136	23	3	132			136	23	3	132	Control
137	25.5	0.9	9			137	22.5	3.2	135			137	22.5	3.2	135	Control
138	25.5	0.7	10			138	22.5	2.8	128			138	22.5	2.8	128	Control
139	25.3	0.8	8			139	22.5	3.1	125			139	22.5	3.1	125	Control
140	25.4	0.8	11			140	22.4	3	135			140	22.4	3	135	Control
141	25.6	0.6	8			141	22.9	2.8	133			141	22.9	2.8	133	Control
142	25.6	0.7	8			142	22.8	2.9	127			142	22.8	2.9	127	Control
143	25.6	0.9	10			143	22.5	2.8	132			143	22.5	2.8	132	Control
144	25.5	0.7	13			144	22.6	2.6	126			144	22.6	2.6	126	Control
145	25.6	0.8	9			145	22.2	2.7	126			145	22.2	2.7	126	Control
146	25.6	0.6	9			146	22.4	3	123			146	22.4	3	123	Control
147	25.5	0.6	8			147	22.1	2.7	131			147	22.1	2.7	131	Control
148	25.5	0.5	10			148	21.9	2.8	132			148	21.9	2.8	132	Control
149	25.6	0.9	9			149	22	3.1	129			149	22	3.1	129	Control
150	25.5	0.7	9			150	22	3	128			150	22	3	128	Control
151	25.6	0.7	7			151	21.7	3.2	118			151	21.7	3.2	118	Control
152	25.5	0.7	9			152	21.9	3.1	124			152	21.9	3.1	124	Control
153	25.6	0.8	9			153	22.1	2.8	125			153	22.1	2.8	125	Control
154	25.7	0.7	9			154	22.2	3	125			154	22.2	3	125	Control
155	25.7	0.7	8			155	22.6	3.2	124			155	22.6	3.2	124	Control
156	25.5	0.7	7			156	22.4	2.6	129			156	22.4	2.6	129	Control
157	25.6	0.8	8			157	22.8	3	121			157	22.8	3	121	Control
158	25.4	0.8	9			158	22.9	2.9	120			158	22.9	2.9	120	Control
159	25.5	0.7	8			159	22.6	2.9	124			159	22.6	2.9	124	Control
160	25.6	0.6	8			160	22.9	3.1	112			160	22.9	3.1	112	Control
161	25.6	0.6	7			161	23	3	116			161	23	3	116	Control
162	25.8	0.8	8			162	22.9	3.1	121			162	22.9	3.1	121	Control
163	25.7	0.7	9			163	22.7	3.1	113			163	22.7	3.1	113	Control
164	25.7	0.8	8			164	22.7	2.9	123			164	22.7	2.9	123	Control
165	25.5	0.8	8			165	22.7	3.1	115			165	22.7	3.1	115	Control
166	25.8	0.8	10			166	22.6	3.1	115			166	22.6	3.1	115	Control
167	25.6	0.8	8			167	22.9	2.6	112			167	22.9	2.6	112	Control
168	25.8	0.8	9			168	22.6	3.1	113			168	22.6	3.1	113	Control
												1	25	1.4	9	Aeromonas
												2	25.2	1.3	13	Aeromonas
												3	25.2	0.8	9	Aeromonas
												4	25.4	0.8	9	Aeromonas
												5	25.4	0.8	8	Aeromonas
												6	25.3	0.8	10	Aeromonas
												7	25.4	0.8	9	Aeromonas
												8	25.3	0.7	9	Aeromonas
												9	25.4	0.7	7	Aeromonas
												10	25.4	0.7	9	Aeromonas
												11	25.5	0.6	9	Aeromonas
												12	25.4	0.8	9	Aeromonas
												13	25.4	0.7	8	Aeromonas
												14	25.3	0.8	7	Aeromonas
												15	25.3	0.5	8	Aeromonas
												16	25.1	0.7	9	Aeromonas
												17	24.7	0.7	8	Aeromonas
												18	24.5	0.7	8	Aeromonas
												19	24.5	0.8	9	Aeromonas
												20	24.3	0.7	13	Aeromonas
												21	24.4	0.8	9	Aeromonas
												22	25	0.8	9	Aeromonas
												23	25.6	0.8	8	Aeromonas
												24	24.5	0.7	10	Aeromonas
												25	24.4	0.8	9	Aeromonas
												26	25	0.7	13	Aeromonas
												27	25.1	0.6	9	Aeromonas
												28	25.1	0.6	9	Aeromonas
												29	25	0.7	8	Aeromonas
												30	25.1	0.9	10	Aeromonas
												31	25.1	0.6	8	Aeromonas
												32	25.2	0.7	9	Aeromonas
												33	24.8	0.8	8	Aeromonas
												34	24.8	0.8	9	Aeromonas
												35	25.5	0.7	9	Aeromonas
												36	25.4	0.6	13	Aeromonas
												37	25.2	0.6	9	Aeromonas
												38	25.4	0.7	9	Aeromonas
												39	24.9	0.5	8	Aeromonas
												40	25.5	0.5	10	Aeromonas
												41	24.9	0.6	8	Aeromonas
												42	25.1	0.7	10	Aeromonas
												43	25.2	0.7	10	Aeromonas
												44	24.7	0.6	9	Aeromonas
												45	25.1	0.7	9	Aeromonas
												46	25.3	0.8	8	Aeromonas
												47	25.1	0.8	9	Aeromonas
												48	25.3	0.6	10	Aeromonas
												49	25.2	0.8	9	Aeromonas
												50	25.3	0.7	9	Aeromonas
												51	25.3	0.8	8	Aeromonas
												52	25.4	0.6	8	Aeromonas
												53	25.5	0.7	10	Aeromonas
												54	25.4	0.7	8	Aeromonas
												55	25.6	0.7	10	Aeromonas
												56	25.6	0.8	10	Aeromonas
												57	25.5	0.7	9	Aeromonas
												58	25.3	0.6	9	Aeromonas
												59	25.2	0.6	8	Aeromonas
												60	25.3	0.7	9	Aeromonas
												61	25.2	0.6	10	Aeromonas
												62	24.9	0.7	9	Aeromonas
												63	25	0.7	9	Aeromonas
												64	24.8	0.7	8	Aeromonas
												65	24.8	0.8	8	Aeromonas
												66	24.8	0.7	10	Aeromonas
												67	25.2	0.7	8	Aeromonas
												68	25	0.8	10	Aeromonas
												69	25	0.7	10	Aeromonas
												70	25.1	0.9	9	Aeromonas
												71	24.8	0.7	9	Aeromonas
												72	25	0.6	8	Aeromonas
												73	25.2	0.7	9	Aeromonas
												74	24.8	0.6	10	Aeromonas
												75	24.9	0.7	9	Aeromonas
												76	24.9	0.6	9	Aeromonas
												77	25.1	0.8	8	Aeromonas
												78	25.1	0.7	8	Aeromonas
												79	25.1	0.8	10	Aeromonas
												80	25.1	0.7	8	Aeromonas
												81	24.9	0.7	10	Aeromonas
												82	25	0.7	10	Aeromonas
												83	25.1	0.7	9	Aeromonas
												84	24.9	0.7	9	Aeromonas
												85	25	0.7	8	Aeromonas
												86	25.8	0.8	9	Aeromonas
												87	25.2	0.7	10	Aeromonas
												88	25	0.6	9	Aeromonas
												89	25.3	0.8	9	Aeromonas
												90	24.9	0.7	8	Aeromonas
												91	25.2	0.7	8	Aeromonas
												92	25	0.7	10	Aeromonas
												93	25.4	0.8	8	Aeromonas
												94	25	0.8	10	Aeromonas
												95	25	0.6	10	Aeromonas
												96	25	0.7	9	Aeromonas
												97	25	0.7	9	Aeromonas
												98	25.2	0.8	8	Aeromonas
												99	25	0.8	9	Aeromonas
												100	25.1	0.5	10	Aeromonas
												101	25	0.8	9	Aeromonas
												102	25	0.7	9	Aeromonas
												103	25.4	0.7	8	Aeromonas
												104	25.1	0.7	9	Aeromonas
												105	25.2	0.7	8	Aeromonas
												106	25.2	0.7	8	Aeromonas
												107	25.2	0.7	9	Aeromonas
												108	25.2	0.8	7	Aeromonas
												109	25.4	0.8	9	Aeromonas
												110	25.1	0.7	9	Aeromonas
												111	25.1	0.9	8	Aeromonas
												112	25.3	0.8	8	Aeromonas
												113	25.4	0.7	9	Aeromonas
												114	24.8	0.7	10	Aeromonas
												115	25.4	0.6	8	Aeromonas
												116	25.2	0.7	11	Aeromonas
												117	25.3	0.6	8	Aeromonas
												118	25.3	0.5	8	Aeromonas
												119	25.1	0.7	10	Aeromonas
												120	25	0.7	7	Aeromonas
												121	25.1	0.7	9	Aeromonas
												122	25.4	0.7	9	Aeromonas
												123	25.3	0.8	8	Aeromonas
												124	25.5	0.8	8	Aeromonas
												125	25.1	0.8	9	Aeromonas
												126	25.4	0.6	10	Aeromonas
												127	25.6	0.8	8	Aeromonas
												128	25.4	0.7	11	Aeromonas
												129	25.7	0.7	8	Aeromonas
												130	25.4	0.7	8	Aeromonas
												131	25.3	0.8	10	Aeromonas
												132	25.5	0.8	7	Aeromonas
												133	25.2	0.9	9	Aeromonas
												134	25.4	0.7	9	Aeromonas
												135	25.6	0.8	8	Aeromonas
												136	25.5	0.6	8	Aeromonas
												137	25.5	0.9	9	Aeromonas
												138	25.5	0.7	10	Aeromonas
												139	25.3	0.8	8	Aeromonas
												140	25.4	0.8	11	Aeromonas
												141	25.6	0.6	8	Aeromonas
												142	25.6	0.7	8	Aeromonas
												143	25.6	0.9	10	Aeromonas
												144	25.5	0.7	13	Aeromonas
												145	25.6	0.8	9	Aeromonas
												146	25.6	0.6	9	Aeromonas
												147	25.5	0.6	8	Aeromonas
												148	25.5	0.5	10	Aeromonas
												149	25.6	0.9	9	Aeromonas
												150	25.5	0.7	9	Aeromonas
												151	25.6	0.7	7	Aeromonas
												152	25.5	0.7	9	Aeromonas
												153	25.6	0.8	9	Aeromonas
												154	25.7	0.7	9	Aeromonas
												155	25.7	0.7	8	Aeromonas
												156	25.5	0.7	7	Aeromonas
												157	25.6	0.8	8	Aeromonas
												158	25.4	0.8	9	Aeromonas
												159	25.5	0.7	8	Aeromonas
												160	25.6	0.6	8	Aeromonas
												161	25.6	0.6	7	Aeromonas
												162	25.8	0.8	8	Aeromonas
												163	25.7	0.7	9	Aeromonas
												164	25.7	0.8	8	Aeromonas
												165	25.5	0.8	8	Aeromonas
												166	25.8	0.8	10	Aeromonas
												167	25.6	0.8	8	Aeromonas
												168	25.8	0.8	9	Aeromonas
