# Supplementary material for: Fever integrates antimicrobial defences, inflammation control, and tissue repair in a cold-blooded vertebrate
Source: eLife. 2023 Mar 14;12:e83644. doi: 10.7554/eLife.83644 (PMC10014077; doi:10.7554/eLife.83644)
Supplement: Figure 3—figure supplement 1—source data 1. [file elife-83644-fig3-figsupp1-data1.xlsx]

## Sheet: Figure 3 - Figure supplement 1
Source Data - Figure 3 - Figure supplement 1
IL-1β		Time (d)	Static 26ᵒC- infected					Static 26ᵒC-Not infected
		0	1	1	1	1	1	1	1	1	1	1
		1	81.12	88.55	90.15	82.33	96.85	1.1	1.11	1.12	1.03	1.05
		2	113.63	126.38	98.02	80.23	100.88	1.22	1.09	1.17	1.11	1.33
TNFα		Time (d)	Static 26ᵒC- infected					Static 26ᵒC-Not infected
		0	1	1	1	1	1	1	1	1	1	1
		1	4.97	4.99	5.19	3.61	4.25	1.04	1.12	1.06	1.08	1.1
		2	3.15	5.48	5.86	2.64	5.25	1.11	1.07	1.07	1.03	1.2
IL-6		Time (d)	Static 26ᵒC- infected					Static 26ᵒC-Not infected
		0	1	1	1	1	1	1	1	1	1	1
		1	2.44	1.44	3.05	1.56	1.66	1.01	1	1.04	1.03	1.03
		2	2.77	2.01	3.42	3.48	1.29	1	1.03	1.11	1.08	1.08
HSP27		Time (d)	Static 26ᵒC- infected					Static 26ᵒC-Not infected
		0	1	1	1	1	1	1	1	1	1	1
		1	93.59	82.98	101.89	91.74	97.15	1.22	1.33	1.12	1.08	1.05
		2	226.18	205.31	230.76	265.34	150.19	1.05	1.11	1.03	1.2	1.14
HSP70		Time (d)	Static 26ᵒC- infected					Static 26ᵒC-Not infected
		0	1	1	1	1	1	1	1	1	1	1
		1	160.07	154.23	139.68	123.04	175.24	1.2	1.08	1.11	1.14	1.02
		2	225.16	287.26	263.12	285.15	223.85	1.22	1.15	1.09	1.1	1
HSP90		Time (d)	Static 26ᵒC- infected					Static 26ᵒC-Not infected
		0	1	1	1	1	1	1	1	1	1	1
		1	136.09	136.13	126.35	131.25	140	1.05	1.05	1.03	1.1	1.1
		2	137.97	143.7	140.22	139.85	144.25	1.07	1.05	1.11	1.13	1.16
