# Supplementary material for: Fever integrates antimicrobial defences, inflammation control, and tissue repair in a cold-blooded vertebrate
Source: eLife. 2023 Mar 14;12:e83644. doi: 10.7554/eLife.83644 (PMC10014077; doi:10.7554/eLife.83644)
Supplement: Figure 3—source data 1. [file elife-83644-fig3-data1.xlsx]

## Sheet: Figure 3A
SourceData - Figure 3A
IL-1β		Time (d)	Static 16ᵒC					Static 26ᵒC					Dynamic
		0	1	1	1	1	1	1	1	1	1	1	1	1	1	1	1
		1	25.66	35.12	30.14	33.12	27.15	81.12	88.55	90.15	82.33	96.85	103.12	112.33	120.41	148.14	168.33
		2	41.37	43.95	30.43	36.96	25.22	113.63	126.38	98.02	80.23	100.88	98.33	116.09	186.13	162	172.52
		4	14.25	22.62	11.69	12.77	15.25	94.63	87.97	83.7	90.05	111.22	108.12	87.33	92.01	89.63	90.74
		7	16.44	22.87	8.33	10.55	15	28.12	15.84	18.12	20.11	23.41	12.24	20.21	18.66	23.14	25.67
		10	10.69	7.53	8.78	7.22	4.23	16.99	7.26	19.71	7.03	15.25	5.12	6.52	4.2	1.96	3.1
		14	3.93	5.66	5.17	2.72	6.33	2.34	3.19	1.47	1.31	1.12	1.34	2.15	1.7	1.42	1.22
TNFα		Time (d)	Static 16ᵒC					Static 26ᵒC					Dynamic
		0	1	1	1	1	1	1	1	1	1	1	1	1	1	1	1
		1	1.02	0.89	0.56	0.96	1.12	4.97	4.99	5.19	3.61	4.25	6.95	8.12	7.23	6.54	5.48
		2	1.41	1.36	1.59	1.22	1.7	3.15	5.48	5.86	2.64	5.25	7.89	9.18	9.26	6.55	8.43
		4	1.6	2.76	0.86	1.48	1.98	3.43	2.14	2.55	1.94	2.25	6.43	4.14	4.55	3.94	5.25
		7	0.82	1.32	1.72	1.24	1.25	1.02	1.9	1.07	0.59	1.24	1.32	1.52	1.19	1.54	2.02
		10	0.88	0.5	0.65	2.08	1.08	1.98	1.78	0.48	1.21	1.06	0.52	0.41	0.63	1.22	1.84
		14	0.8	0.53	0.55	1.08	1.01	0.31	0.66	1.02	0.55	0.22	0.12	0.46	0.85	0.3	0.41
IL-6		Time (d)	Static 16ᵒC					Static 26ᵒC					Dynamic
		0	1	1	1	1	1	1	1	1	1	1	1	1	1	1	1
		1	0.89	0.95	1.15	1.22	1.47	2.44	1.44	3.05	1.56	1.66	2.65	2.76	3.22	4.31	3.67
		2	1.67	1.36	1.12	1.08	0.35	2.77	2.01	3.42	3.48	1.29	4.61	3.42	4.57	4.45	3.95
		4	1.32	1.21	1.63	0.89	0.99	2.12	1.25	2.13	2.55	3.12	3.56	3.89	2.69	3.08	4.14
		7	1.22	0.31	1.13	0.98	1.34	0.55	1.44	0.76	0.14	0.23	1.22	1.86	0.57	0.65	0.58
		10	1.6	0.79	1.22	1.56	0.98	1.02	1.44	1.74	0.6	0.74	0.95	1.86	0.76	1.92	0.87
		14	0.73	0.36	0.02	1.02	1.52	0.55	0.42	0.58	1.2	0.33	0.22	0.41	0.12	0.96	0.33
HSP70		Time (d)	Static 16ᵒC					Static 26ᵒC					Dynamic
		0	1	1	1	1	1	1	1	1	1	1	1	1	1	1	1
		1	31.2	30.22	29.33	48.12	34.98	160.07	154.23	139.68	123.04	175.24	298.76	186.09	226.13	192.55	287.33
		2	41.15	40	39.89	46.95	42.36	225.16	287.26	263.12	285.15	223.85	423.56	341.12	382.15	342.15	403.65
		4	37.427	30.52	30.42	37.64	31.26	122.27	111.9	145.28	124.25	177.5	296.38	188.02	150.23	198.78	280.22
		7	29.01	25.22	33.96	22.11	32	66.23	77.12	53.62	60.63	71.68	42.77	34.25	22.62	41.69	44.02
		10	27.03	26.99	37.26	20.71	31.02	25.66	15.17	14.25	20.08	20.71	22.77	34.25	22.62	31.69	14.02
		14	17.12	13.41	16.53	19.7	23.14	10.69	16.53	18.78	7.23	9.88	16.44	19.72	19.86	16.47	9.14
HSP90		Time (d)	Static 16ᵒC					Static 26ᵒC					Dynamic
		0	1	1	1	1	1	1	1	1	1	1	1	1	1	1	1
		1	59.89	66.95	49.15	55.23	45.89	136.09	136.13	126.35	131.25	140	282.68	288.33	126.13	226.15	271.25
		2	32.62	51.69	62.77	47.88	39.66	137.97	143.7	140.22	139.85	144.25	231.48	144.63	146.8	150.22	169.85
		4	57.26	29.71	27.03	31.22	40.12	88.02	90.23	65.33	78.52	86.99	94.26	86.38	190.23	165.33	78.52
		7	35.66	25.17	32.72	30.21	26.58	142.87	123.33	118.99	131.22	23.93	128.84	96.24	124.33	119.79	51.22
		10	5.19	3.47	2.31	3.63	4	12.53	9.78	5.25	7.82	10.34	2.59	8.69	9.78	5.25	7.82
		14	1.25	0.98	1.2	1.13	1.05	0.78	1.07	1.18	1.2	1.04	1.12	1.14	1.09	1.08	1.25
