# Supplementary material for: Fever integrates antimicrobial defences, inflammation control, and tissue repair in a cold-blooded vertebrate
Source: eLife. 2023 Mar 14;12:e83644. doi: 10.7554/eLife.83644 (PMC10014077; doi:10.7554/eLife.83644)
Supplement: Figure 3—source data 2. [file elife-83644-fig3-data2.xlsx]

## Sheet: Figure 3B
SourceData - Figure 3B
		Time (h)	Static 16ᵒC						Static 26ᵒC						Dynamic
		0	419.8	536.6	351.6	355.9	554	763.1	419.8	536.6	351.6	355.9	554	763.1	419.8	536.6	351.6	355.9	554	763.1
		12	527.6	1204.9	1133.6	973.2	521.3	799.2	1034.3	639.8	1026.4	794.8	826.2	423.6	799.1	450.3	1515.9	641.7	1883.7	1366.6
		24	593	1195.5	544.6	721.3	401.4	946.9	1001.4	476.1	839.1	791.8	163.5	475.6	2038.1	2626.4	1548.7	2892.5	908.8	1161.8
		48	495.9	253.8	891.2	679	491	1150.2	748	336	222.5	876.1	469.5	471.4	615.8	845.9	536.1	1091.2	589.3	818.2
		72	695.8	791.2	557.7	545	509.7	659	255.4	733.1	394.8	487.5	159.4	214.4	356.6	316	334.7	336.2	475.5	625.5
