# Supplementary material for: Fever integrates antimicrobial defences, inflammation control, and tissue repair in a cold-blooded vertebrate
Source: eLife. 2023 Mar 14;12:e83644. doi: 10.7554/eLife.83644 (PMC10014077; doi:10.7554/eLife.83644)
Supplement: Figure 3—source data 3. [file elife-83644-fig3-data3.xlsx]

## Sheet: Figure 3C
Source Data - Figure 3C
Thermal preference 26-34h period
		Time (h)	Aeromonas					AVK					Saline
		26	24.56	25.23	24.12	24.18	24.5	20.81	23.32	23.82	25.42	20.85	22.46	22.36	22.19	22.99	23
		27	24.65	24.55	24.11	23.88	24.88	22.12	22.7	23.59	25.78	22.3	22.82	22.44	22.53	22.89	22.66
		28	24.56	25.88	24.91	23.58	25.9	22.47	23.82	24.2	25.05	22.35	22.3	22.03	22.17	22.19	22.3
		29	25.36	25.89	24.46	25.02	25	22.49	22.95	23.9	25.5	20.6	22.3	22.13	22.47	22.99	22.63
		30	25.98	24.51	24.22	24.97	25.87	22.36	24.57	23.16	26	21	22	21.98	21.88	22.07	22.61
		31	25.86	24.31	24.02	25.2	25.66	22.6	21.92	24.32	25.85	21.17	22.46	22.36	22.19	22.99	23
		32	25.19	24.89	24.55	25.2	25.8	22.58	24.47	24.21	25.97	20.99	23.32	22.21	23.46	23.2	22.33
		33	25.39	25.3	24.92	24.68	25.41	22.54	24.14	23.87	24.89	20.97	23.4	23.21	23	23.41	22.96
AVK group-ketorolac inhibition of fever
Thermal preference
				Averonii
		hour post AV infection (hpi)	hour to ketorolac	fish 1	fish 2	fish 3	fish 4	fish 5
		24	-2	24.5	23.5	25.97	25.6	23.03
		25	-1	24	23.02	25.59	25.91	23.73
			0	AVK
		26	1	20.81	23.32	23.82	25.42	20.85
		27	2	22.12	22.7	23.59	25.78	22.3
		28	3	22.47	23.82	24.2	25.05	22.35
		29	4	22.49	22.95	23.9	25.5	20.6
		30	5	22.36	24.57	23.16	26	21
		31	6	22.6	21.92	24.32	25.85	21.17
		32	7	22.58	24.47	24.21	25.97	20.99
		33	8	22.54	24.14	23.87	24.89	20.97
Velocity
				Averonii
		hour post AV infection (hpi)	hour to ketorolac	fish 1	fish 2	fish 3	fish 4	fish 5
		24	-2	0.681	1.94483	0.332806	1.37511	0.737411
		25	-1	0.501	1.50813	0.379028	0.431123	0.449143
			0	AVK
		26	1	15.0741	1.39408	1.19052	2.03025	1.08075
		27	2	13.8565	1.71624	2.14809	0.581779	1.15217
		28	3	8.56544	1.80572	1.8978	1.63446	0.458919
		29	4	7.26591	1.82877	1.94433	1.38401	0.810505
		30	5	8.93614	1.68991	2.69813	0.140482	0.257137
		31	6	6.04151	1.50287	1.54172	0.354908	0.227675
		32	7	7.37026	1.09817	1.78389	0.163017	0.167276
		33	8	7.30213	1.07951	1.27681	2.14182	0.281437
Zone transition
				Averonii
		hour post AV infection (hpi)	hour to ketorolac	fish 1	fish 2	fish 3	fish 4	fish 5
		24	-2	1	0	4	50	45
		25	-1	4	182	39	30	87
			0	AVK
		26	1	0	133	169	166	1046
		27	2	9	193	282	59	1138
		28	3	14	170	238	147	889
		29	4	3	166	260	110	700
		30	5	4	115	288	21	892
		31	6	23	129	226	43	600
		32	7	14	109	275	29	621
		33	8	14	103	184	206	686
