# Supplementary material for: Fever integrates antimicrobial defences, inflammation control, and tissue repair in a cold-blooded vertebrate
Source: eLife. 2023 Mar 14;12:e83644. doi: 10.7554/eLife.83644 (PMC10014077; doi:10.7554/eLife.83644)
Supplement: Figure 4—source data 1. [file elife-83644-fig4-data1.xlsx]

## Sheet: Figure 4A
Source Data - Figure 4A
CFU/Furuncle		Time (d)	Static 16ᵒC					Static 26ᵒC					Dynamic
		1	400	400	400	400	400	400	400	400	400	400	400	400	400	400	400
		2	400	400	400	400	400	389	345	391	379	400	300	250	276	310	284
		4	400	400	400	400	400	110	112	140	155	163	85	45	33	16	22
		7	71	110	53	61	55	20	12	15	25	11	4	5	3	2	2
		10	23	41	33	15	29	5	7	9	3	5	2	1	2	0	1
		14	5	2	5	3	2	2	3	4	5	1	0	1	1	0	2
