# Supplementary material for: Fever integrates antimicrobial defences, inflammation control, and tissue repair in a cold-blooded vertebrate
Source: eLife. 2023 Mar 14;12:e83644. doi: 10.7554/eLife.83644 (PMC10014077; doi:10.7554/eLife.83644)
Supplement: Figure 4—source data 2. [file elife-83644-fig4-data2.xlsx]

## Sheet: Figure 4B
Source Data - Figure 4B
CFU/ml (x10⁶)		Time (h)	Static 16ᵒC			Static 21ᵒC			Static 26ᵒC
		0	114.52	110.79	110.79	112.04	105.82	104.58	107.06	109.55	100.85
		1	202.8	200.32	202.8	241.35	222.7	221.46	260.85	268.48	263.82
		2	289.68	283.32	287.56	315.55	301.13	308.76	346.5	337.6	348.2
		3	332.93	334.2	334.2	379.58	387.68	356.25	390.15	385.71	386.99
		4	383.5	382.99	382.73	395.44	387.68	388.02	409.42	403.2	403.54
		5	396.12	394.5	393.13	408.06	402.94	402.26	430	439.58	435.83
		6	405.25	407.63	406.95	425	433.33	427.5	510.83	477.08	497.08
