# Supplementary material for: Fever integrates antimicrobial defences, inflammation control, and tissue repair in a cold-blooded vertebrate
Source: eLife. 2023 Mar 14;12:e83644. doi: 10.7554/eLife.83644 (PMC10014077; doi:10.7554/eLife.83644)
Supplement: Figure 4—source data 3. [file elife-83644-fig4-data3.xlsx]

## Sheet: Figure 4C
Source Data - Figure 3A
		Time (h)	Static 16ᵒC			Static 26ᵒC			Dynamic
		0	47	52	60	46	58	70	75	64	50
		4	98	76	127	167	196	289	320	274	54
		8	53	160	91	247	415	532	484	211	389
		16	63	191	231	1070	621	728	561	482	836
		24	325	263	321	1301	1489	957	1133	902	1138
		48	915	1156	1359	151	227	750	379	237	198
		72	764	823	1123	152	449	114	183	359	123
