# Supplementary material for: Fever integrates antimicrobial defences, inflammation control, and tissue repair in a cold-blooded vertebrate
Source: eLife. 2023 Mar 14;12:e83644. doi: 10.7554/eLife.83644 (PMC10014077; doi:10.7554/eLife.83644)
Supplement: Figure 4—source data 4. [file elife-83644-fig4-data4.xlsx]

## Sheet: Figure 4D
Source Data - Figure 4D
% ROS+		Time (h)	Static 16ᵒC					Static 26ᵒC					Dynamic
		0	4.9	7.4	6.1	1.2	9.1	4.9	7.4	6.1	1.2	9.1	4.9	7.4	6.1	1.2	9.1
		12	5.86	4.65	3.19	1.78	0.56	7.1	1.03	4.8	6.8	4.7	2.7	4.7	2.8	1.3	5.3
		24	58.2	53.4	83.6	79.7	56	47.6	48.1	43.4	43.8	47.3	17.2	39.6	12.48	14.2	21.7
		36	84	58.3	81.9	84.1	85.9	84	58.7	59.2	53.8	86.9	26.8	46.9	22	49.6	29.6
		48	84.6	80.3	80.9	79.9	61.6	16.5	14.9	16.4	16.1	24.7	19.78	16	15.7	17.6	24.1
		72	15.5	17.7	31.5	26.2	29.1	3.47	1.9	2.4	5.7	1.05	5.9	6.2	5.5	0.7	5.8
% NO+		Time (h)	Static 16ᵒC					Static 26ᵒC					Dynamic
		0	9.42	13.1	11.2	14.1	13.7	9.42	13.1	11.2	14.1	13.7	9.42	13.1	11.2	14.1	13.7
		12	26	15	14.2	14.5	14.6	17.9	14.4	12.2	10.5	15.7	25	24.1	10.6	13.4	17.2
		24	20.7	26.2	33.8	37.7	17.1	31.9	35.5	22.4	24.8	37.9	76.2	78.6	60.3	64.2	72
		36	61.4	47.7	32.6	33.1	33.1	61	49.1	50.6	43.7	35.5	44.4	71.9	42	81	69
		48	2.87	18.9	21.5	30.6	39	43.2	42.4	59	57.5	54.7	41.5	48.8	60.1	54.9	46.8
		72	30.8	32.9	21.3	18.1	12.6	17.5	15.7	15.7	18.6	15.2	5.9	34.6	10.5	25.9	21.8
iNOS		Time (h)	Static 16ᵒC					Static 26ᵒC					Dynamic
		0	1	1	1	1	1	1	1	1	1	1	1	1	1	1	1
		8	21.59	28.41	6.71	10.32	15.47	18.42	21.53	7.41	3.17	7.13	19.48	30.149	2.578	23.27	9.57
		16	131.25	156.36	129.28	20.15	75.29	56.42	124.27	135.28	52.17	221.3	264.15	489.21	189.47	89.27	178.96
		24	226.48	189.08	295.65	259.78	245.04	70.71	56.44	175.88	152.28	284.21	760.77	794.32	546.61	396.62	483.58
		36	233.22	29.41	459.64	148.64	54.82	549.25	23.78	369.85	69.34	19.42	554.82	457.29	222.44	845.63	46.97
		48	190.33	9.9	17.39	203.02	121.47	712.61	92.28	74.95	298.58	67.37	224.89	168.02	242.03	605.33	189.03
		72	326.84	36.41	187.23	24.95	199.34	236.87	11.28	157.63	36.47	79.35	445.66	211.63	52.49	69.64	194.25
