# Supplementary material for: Fever integrates antimicrobial defences, inflammation control, and tissue repair in a cold-blooded vertebrate
Source: eLife. 2023 Mar 14;12:e83644. doi: 10.7554/eLife.83644 (PMC10014077; doi:10.7554/eLife.83644)
Supplement: Figure 5—source data 1. [file elife-83644-fig5-data1.xlsx]

## Sheet: Figure 5A
Source Data - Figure 5A
TNF-α		Time (h)	Static 16ᵒC					Static 26ᵒC					Dynamic
		0	1	1	1	1	1	1	1	1	1	1	1	1	1	1	1
		8	1.25	2.57	1.78	0.96	3.78	2.58	3.78	0.24	0.19	0.9	3.89	5.24	2.78	0.52	0.14
		16	1.54	0.59	1.23	2.45	0.048	11.89	5.78	3.47	29.31	4.56	31.25	5.09	3.79	12.45	7.52
		24	3.72	0.7	2.88	1.02	0.8	9.96	16.89	5.59	4.83	5.66	13.12	4.52	4.72	5.48	7.89
		36	15.48	5.89	4.25	3.56	8.25	1.49	5.12	3.16	9.84	2.63	2.48	3.89	6.48	1.79	2.85
		48	11.33	9.48	8.94	4.48	13.89	2.3	8.09	3.44	5.67	7.5	7.39	3.25	5.34	2.49	4.25
		72	13.58	2.69	3.47	4.89	7.21	5.21	3.15	7.89	8.17	1.78	1.58	3.26	11.25	3.41	2.45
IL-1β		Time (h)	Static 16ᵒC					Static 26ᵒC					Dynamic
		0	1	1	1	1	1	1	1	1	1	1	1	1	1	1	1
		8	54.28	24.16	15.47	11.96	39.33	10.63	35.86	47.21	30.28	12.79	34.29	12.96	46.96	70.14	11.63
		16	84.25	36.89	90.47	124.39	86.25	42.15	89.47	95.36	36.97	20.47	74.25	49.36	85.47	29.17	100.46
		24	114.47	28.03	135.78	166.93	159.69	135.91	124.09	58.34	79.21	59.55	88.84	114.49	78.87	92.01	85.92
		36	134.29	205.67	189.36	94.39	154.36	114.78	59.47	97.48	64.21	32.47	101.56	95.69	75.19	30.79	86.74
		48	76.46	42.02	84.87	50.97	83.81	25.03	35.42	43.04	31.77	62.38	50.45	27.55	27.83	32.04	29.3
		72	28.33	14.56	7.84	20.31	19.78	22.19	4.32	13.47	17.23	2.47	5.48	16.97	20.17	4.18	11.38
CXCL8		Time (h)	Static 16ᵒC					Static 26ᵒC					Dynamic
		0	1	1	1	1	1	1	1	1	1	1	1	1	1	1	1
		8	5.14	2.79	3.17	0.48	0.77	1.47	2.47	2.96	0.78	0.98	3.85	2.14	0.17	0.9	1.78
		16	19.25	7.18	15.23	3.46	12.45	51.26	72.48	41.89	5.14	28.45	59.36	59.47	5.25	79.41	40.85
		24	20.39	6.58	33.96	15.98	25.36	35.6	29.6	30.2	16.4	21.3	21.7	34.66	12.24	16.96	20.82
		36	94.25	31.87	78.29	80.14	51.22	15.47	2.16	0.39	7.12	8.99	7.59	11.25	3.67	1.47	4.13
		48	75.22	24.15	68.08	42.11	64.22	22.7	29.22	17.56	19.79	3.14	2.33	4.83	3.88	2.34	3.79
		72	52	15.48	25.14	5.96	4.12	11.25	6.79	5.47	0.58	1.22	12.59	5.14	3.47	8.96	0.47
TGFβ		Time (h)	Static 16ᵒC					Static 26ᵒC					Dynamic
		0	1	1	1	1	1	1	1	1	1	1	1	1	1	1	1
		8	1.25	2.69	0.58	3.47	0.41	0.47	0.38	2.56	3.78	4.14	1.42	3.47	2.14	0.096	0.14
		16	5.69	0.25	1.57	3.69	4.17	3.14	1.49	5.14	2.09	0.07	4.87	3.47	0.49	1.78	0.42
		24	3.21	3.56	29.09	3.94	4.95	37.62	30.254	59.25	5.58	20.02	30.38	24.49	42.64	2.6	43.2
		36	18.24	7.45	3.73	5.36	1.47	59.78	43.59	34.21	12.45	25.41	65.45	32.56	19.12	42.75	50.46
		48	7.43	12.23	10.1	9.65	19.85	19.91	4.06	9.02	58.96	4.36	28.38	41.48	23.64	19.75	28.47
		72	54.26	17.24	25.36	19.36	14.56	17.49	7.49	5.21	8.36	1.42	56.21	23.14	18.14	10.47	9.78
VEGF		Time (h)	Static 16ᵒC					Static 26ᵒC					Dynamic
		0	1	1	1	1	1	1	1	1	1	1	1	1	1	1	1
		8	1.36	3.47	0.14	0.92	1.02	3.98	2.17	0.52	0.74	4.52	2.18	3.25	1.79	4.55	0.25
		16	3.27	1.89	8.21	2.64	3.52	5.67	3.29	10.87	1.49	4.21	24.13	12.96	2.85	6.26	7.49
		24	1.22	2.59	11.72	3.17	4.39	19.95	19.01	34.29	4.95	11.03	9.39	14.83	27.65	1.85	23.36
		36	6.29	7.14	1.59	2.79	7.24	25.48	14.59	7.14	35.19	15.49	51.47	14.89	18.42	19.27	9.22
		48	9.42	11.16	6.57	10.48	9.54	11.42	8.59	7.52	31.57	6.43	21.26	20.91	18.29	11.88	20.51
		72	21.56	5.17	7.85	11.23	7.61	16.96	3.21	7.82	15.42	5.26	23.16	10.79	15.47	6.98	11.23
IL-10		Time (h)	Static 16ᵒC					Static 26ᵒC					Dynamic
		0	1	1	1	1	1	1	1	1	1	1	1	1	1	1	1
		8	1.24	3.48	0.14	0.99	2.34	4.21	1.97	2.1	0.89	0.11	1.22	3.78	0.19	0.98	1.78
		16	5.63	1.24	3.88	2.47	0.12	5.14	0.36	1.89	2.47	3.14	0.96	1.47	2.69	3.14	1.22
		24	10.46	1.4	2.19	1.91	0.8	2.02	1.36	3.35	1.01	2.39	0.67	1.4	1.67	2.9	2.41
		36	5.41	1.24	2.48	0.69	0.34	0.12	0.98	1.22	2.78	3.97	0.47	0.32	1.28	5.3	2.47
		48	2.15	2.47	2.75	3.9	4.58	1.68	4.38	2.06	1.81	1.86	1.06	2.28	3.53	1.53	2.61
		72	14.89	21.59	12.29	3.58	2.36	22.14	3.64	12.36	4.89	6.89	11.58	9.53	25.69	7.48	1.78
