# Supplementary material for: Fever integrates antimicrobial defences, inflammation control, and tissue repair in a cold-blooded vertebrate
Source: eLife. 2023 Mar 14;12:e83644. doi: 10.7554/eLife.83644 (PMC10014077; doi:10.7554/eLife.83644)
Supplement: Supplementary file 1. [file elife-83644-supp1.xlsx]

## Sheet: Sheet1
	Table 1: Primer sequences for quantitative PCR
	Target gene	Abbreviation	Sequence (5'-3')	Accession number
	beta actin	actinb F	GAC CAA CCC AAA CCT CTC AA	AB039726
		actinb R	AGT CAA TGC GCC AAA CAG A
	interleukin 1, beta	il1b F	GAT GCG CTG CTC AGC TTC T	KC771268
		il1b R	AGT GGG TGC TAC ATT AAC CAT ACG
	tumor necrosis factor a	tnfa F	TCA TTC CTT ACG ACG GCA TTT	EU069817
		tnfa R	CAG TCA CGT CAG CCT TGC AG
	interleukin-6	il6 F	CAG ATA GCG GAC GGA GGG GC	XM_019073058
		il6 R	GCG GGT CTC TTC GTG TCT T
	C-X-C motif chemokine ligand 8	cxcl8 F	CTG AGA CTT TAC AGT GTG AGT GTG AGT TTG GAA	HM355573
		cxcl8 R	TGG TGT CTT TAC AGT GTG AGT TTG G
	transforming growth factor b	tgfb F	GTA CAC TAC GGC GGA GGA TTG	EU086521
		tgfb R	CGC TTC GAT TCG CTT TCT CT
	vascular endothelial growth factor	vegf F	ATG AGA ACC ACA CAG GAC GGG ATG TA	XM026228403
		vegf R	CGA GAG CTG CTG GTA GAC ATC ATT
	interleukin 10	il10 F	CAA GGA GCT CCG TTC TGC AT	HQ259106
		il10 R	TCG AGT AAT GGT GCC AAG TCA TCA
	inducible nitric oxide synthase a	nos2 F	TTG GTA CAT GGG CAC TGA GAT T	AY904362
		nos2 R	CCA ACC CGC TCA AGA ACA TT
	heat shock protein 27	hsp27 F	GATTCCACCAGACATCGCCA	DQ872651
		hsp27 R	ATTCCCAACTCCACCATGTG
	heat shock protein 70	hsp70 F	GCT GGC TGA CAA AGA GGA GT	AB092839
		hsp70 R	TGG CAT CCC TCC CTG ATA CA
	heat shock protein 90	hsp90 F	AGG CGT TGT GGA CTC TGA TG	KT985291
		hsp90 R	ATC ATG TCC AGG GTC TTG CG
